# Supplementary material for: Real-world experience of safety and effectiveness of regorafenib for treatment of metastatic colorectal cancer, advanced gastrointestinal stromal tumors, and hepatocellular carcinoma: a post-marketing surveillance study in Korea
Source: PubMed Central journal article supplement (PMC9608207; doi:10.7150/jca.74107), 2022-09-21
Supplement: jcav13p3396s1.pdf [file jcav13p3396s1.pdf]

**Table S1.** Prior anticancer agents

|                        | <b>CRC (N=254)</b> | <b>GIST (N=14)</b> | <b>HCC (N=33)</b> |
|------------------------|--------------------|--------------------|-------------------|
|                        | No. of patient     | No. of patient     | No. of patient    |
|                        | N (%)              | N (%)              | N (%)             |
| Cytotoxic chemotherapy | 252 (99.2)         | 0 (0.0)            | 9 (27.3)          |
| anti-VEGF biologics    | 238 (93.7)         | 0 (0.0)            | 0 (0.0)           |
| anti-EGFR biologics    | 88 (34.7)          | 0 (0.0)            | 0 (0.0)           |
| TKIs                   | 1 (0.4)            | 14 (100.0)         | 32 (97.0)         |
| Investigational drug*  | 4 (1.6)            | 0 (0.0)            | 0 (0.0)           |

\* Patients who participated in other clinical trials

**Table S2.** Incidence rates of AEs and ADRs for CRC patients (>1%)

| <b>CRC (N=254)</b>                         |           |           |            |           |
|--------------------------------------------|-----------|-----------|------------|-----------|
|                                            | <b>AE</b> |           | <b>ADR</b> |           |
|                                            | Any grade | ≥ Grade 3 | Any grade  | ≥ Grade 3 |
|                                            | No. (%)   | No. (%)   | No. (%)    | No. (%)   |
| <b>Clinical adverse event</b>              |           |           |            |           |
| Palmar-plantar erythrodysesthesia syndrome | 71 (28.0) | 13 (5.1)  | 71 (28.0)  | 13 (5.1)  |
| Asthenia                                   | 29 (11.4) | 10 (3.9)  | 17 (6.7)   | 4 (1.6)   |
| Abdominal pain                             | 24 (9.5)  | 4 (1.6)   | 4 (1.6)    | 0 (0.0)   |
| Decreased appetite                         | 24 (9.5)  | 3 (1.2)   | 15 (5.9)   | 1 (0.4)   |
| Diarrhoea                                  | 21 (8.3)  | 2 (0.8)   | 20 (7.9)   | 2 (0.8)   |
| Pyrexia                                    | 21 (8.3)  | 0 (0.0)   | 2 (0.8)    | 0 (0.0)   |
| Rash                                       | 20 (7.9)  | 3 (1.2)   | 16 (6.3)   | 2 (0.8)   |
| Stomatitis                                 | 15 (5.9)  | 2 (0.8)   | 13 (5.1)   | 2 (0.8)   |
| Back pain                                  | 12 (4.7)  | 4 (1.6)   | 1 (0.4)    | 0 (0.0)   |
| Constipation*                              | 12 (4.7)  | 0 (0.0)   | 1 (0.4)    | 0 (0.0)   |
| Vomiting                                   | 12 (4.7)  | 3 (1.2)   | 6 (2.4)    | 0 (0.0)   |
| Nausea                                     | 10 (3.9)  | 1 (0.4)   | 5 (2.0)    | 0 (0.0)   |
| Dyspepsia*                                 | 9 (3.5)   | 0 (0.0)   | 5 (2.0)    | 0 (0.0)   |
| Cough*                                     | 8 (3.2)   | 2 (0.8)   | 1 (0.4)    | 0 (0.0)   |
| Dyspnoea*                                  | 8 (3.2)   | 1 (0.4)   | 2 (0.8)    | 1 (0.4)   |
| Fatigue                                    | 8 (3.2)   | 3 (1.2)   | 5 (2.0)    | 2 (0.8)   |

|                               |         |         |         |          |
|-------------------------------|---------|---------|---------|----------|
| Oedema peripheral*            | 7 (2.8) | 0 (0.0) | 1 (0.4) | 0 (0.0)  |
| Abdominal pain upper          | 6 (2.4) | 0 (0.0) | 0 (0.0) | 0 (0.0)  |
| Jaundice*                     | 6 (2.4) | 2 (0.8) | 1 (0.4) | 1 (0.4)  |
| Musculoskeletal pain          | 6 (2.4) | 2 (0.8) | 0 (0.0) | 0 (0.0)  |
| Pain in extremity             | 6 (2.4) | 0 (0.0) | 2 (0.8) | 0 (0.0)  |
| Abdominal distension*         | 5 (2.0) | 3 (1.2) | 1 (0.4) | 0 (0.0)  |
| Myalgia                       | 5 (2.0) | 0 (0.0) | 4 (1.6) | 0 (0.0)  |
| Pneumonia                     | 5 (2.0) | 1 (0.4) | 0 (0.0) | 0 (0.0)  |
| Productive cough*             | 5 (2.0) | 0 (0.0) | 2 (0.8) | 0 (0.0)  |
| Sepsis                        | 5 (2.0) | 4 (1.6) | 1 (0.4) | 1 (0.4)  |
| Urinary tract infection       | 5 (2.0) | 3 (1.2) | 0 (0.0) | 0 (0.0)  |
| Dysphonia                     | 4 (1.6) | 0 (0.0) | 2 (0.8) | 0 (0.0)  |
| Flank pain                    | 4 (1.6) | 0 (0.0) | 0 (0.0) | 0 (0.0)  |
| Hypertension                  | 4 (1.6) | 1 (0.4) | 1 (0.4) | 1 (0.39) |
| Hypophagia                    | 4 (1.6) | 0 (0.0) | 1 (0.4) | 0 (0.0)  |
| Oropharyngeal pain            | 4 (1.6) | 0 (0.0) | 1 (0.4) | 0 (0.0)  |
| Pain                          | 4 (1.6) | 0 (0.0) | 1 (0.4) | 0 (0.0)  |
| Peripheral sensory neuropathy | 4 (1.6) | 0 (0.0) | 4 (1.6) | 0 (0.0)  |
| Blister*                      | 3 (1.2) | 0 (0.0) | 3 (1.2) | 0 (0.0)  |
| Cancer pain                   | 3 (1.2) | 0 (0.0) | 2 (0.8) | 0 (0.0)  |
| Haematuria                    | 3 (1.2) | 1 (0.4) | 0 (0.0) | 0 (0.0)  |
| Headache                      | 3 (1.2) | 0 (0.0) | 1 (0.4) | 0 (0.0)  |
| Hepatitis                     | 3 (1.2) | 1 (0.4) | 2 (0.8) | 0 (0.0)  |

|                      |         |         |         |         |
|----------------------|---------|---------|---------|---------|
| Hiccups*             | 3 (1.2) | 0 (0.0) | 0 (0.0) | 0 (0.0) |
| Insomnia*            | 3 (1.2) | 0 (0.0) | 1 (0.4) | 0 (0.0) |
| Mucosal inflammation | 3 (1.2) | 0 (0.0) | 2 (0.8) | 0 (0.0) |
| Muscular weakness*   | 3 (1.2) | 0 (0.0) | 1 (0.4) | 0 (0.0) |
| Pleural effusion*    | 3 (1.2) | 2 (0.8) | 0 (0.0) | 0 (0.0) |
| Procedural pain      | 3 (1.2) | 0 (0.0) | 0 (0.0) | 0 (0.0) |
| Weight decreased     | 3 (1.2) | 0 (0.0) | 2 (0.8) | 0 (0.0) |

---

**Laboratory abnormalities**

|                                      |          |         |          |         |
|--------------------------------------|----------|---------|----------|---------|
| Aspartate aminotransferase increased | 24 (9.5) | 2 (0.8) | 15 (5.9) | 1 (0.4) |
| Alanine aminotransferase increased   | 15 (5.9) | 2 (0.8) | 7 (2.8)  | 1 (0.4) |
| Anaemia                              | 13 (5.1) | 8 (3.2) | 8 (3.2)  | 5 (2.0) |
| Blood bilirubin increased            | 7 (2.8)  | 3 (1.2) | 2 (0.8)  | 0 (0.0) |
| Neutropenia <sup>a)</sup>            | 7 (2.8)  | 5 (2.0) | 7 (2.8)  | 5 (2.0) |
| Thrombocytopenia                     | 4 (1.6)  | 2 (0.8) | 4 (1.6)  | 2 (0.8) |
| Hypoalbuminaemia*                    | 3 (1.2)  | 0 (0.0) | 1 (0.4)  | 0 (0.0) |

---

AE, adverse event; ADR, adverse drug reaction; CRC, colorectal cancer. Incidence rates are presented as number (%) of patients with AE and ADR. \* Unexpected AE. <sup>a)</sup>

Consolidated term comprising the following synonymous MedDRA preferred terms:

neutropenia, neutrophil count decreased

**Table S3.** Incidence rates of AEs and ADRs for GIST patients

| <b>GIST(N=14)</b>                          |           |           |            |           |
|--------------------------------------------|-----------|-----------|------------|-----------|
|                                            | <b>AE</b> |           | <b>ADR</b> |           |
|                                            | Any grade | ≥ Grade 3 | Any grade  | ≥ Grade 3 |
|                                            | No. (%)   | No. (%)   | No. (%)    | No. (%)   |
| <b>Clinical adverse event</b>              |           |           |            |           |
| Palmar-plantar erythrodysesthesia syndrome | 5 (35.7)  | 2 (14.3)  | 5 (35.7)   | 2 (14.3)  |
| Asthenia                                   | 2 (14.3)  | 0 (0.0)   | 0 (0.0)    | 0 (0.0)   |
| Constipation*                              | 2 (14.3)  | 0 (0.0)   | 1 (7.1)    | 0 (0.0)   |
| Decreased appetite                         | 2 (14.3)  | 0 (0.0)   | 1 (7.1)    | 0 (0.0)   |
| Diarrhoea                                  | 2 (14.3)  | 0 (0.0)   | 1 (7.1)    | 0 (0.0)   |
| Myalgia                                    | 2 (14.3)  | 0 (0.0)   | 1 (7.1)    | 0 (0.0)   |
| Abdominal pain                             | 1 (7.1)   | 0 (0.0)   | 1 (7.1)    | 0 (0.0)   |
| Acute kidney injury*                       | 1 (7.1)   | 0 (0.0)   | 1 (7.1)    | 0 (0.0)   |
| Anal abscess                               | 1 (7.1)   | 0 (0.0)   | 1 (7.1)    | 0 (0.0)   |
| Colitis*                                   | 1 (7.1)   | 0 (0.0)   | 1 (7.1)    | 0 (0.0)   |
| Gastrointestinal haemorrhage               | 1 (7.1)   | 0 (0.0)   | 0 (0.00)   | 0 (0.0)   |
| Insomnia*                                  | 1 (7.1)   | 0 (0.0)   | 0 (0.00)   | 0 (0.0)   |
| Pneumonia                                  | 1 (7.1)   | 0 (0.0)   | 0 (0.00)   | 0 (0.0)   |
| Pruritus*                                  | 1 (7.1)   | 0 (0.0)   | 1 (7.1)    | 0 (0.0)   |
| Pyrexia                                    | 1 (7.1)   | 0 (0.0)   | 1 (7.1)    | 0 (0.0)   |
| Rash                                       | 1 (7.1)   | 0 (0.0)   | 1 (7.1)    | 0 (0.0)   |

|                                   |         |         |         |         |
|-----------------------------------|---------|---------|---------|---------|
| Upper respiratory tract infection | 1 (7.1) | 0 (0.0) | 1 (7.1) | 0 (0.0) |
| Urinary tract infection           | 1 (7.1) | 0 (0.0) | 0 (0.0) | 0 (0.0) |
| Vomiting                          | 1 (7.1) | 0 (0.0) | 0 (0.0) | 0 (0.0) |

---

**Laboratory abnormalities**

|                                      |         |         |         |         |
|--------------------------------------|---------|---------|---------|---------|
| Alanine aminotransferase increased   | 1 (7.1) | 0 (0.0) | 1 (7.1) | 0 (0.0) |
| Aspartate aminotransferase increased | 1 (7.1) | 0 (0.0) | 1 (7.1) | 0 (0.0) |

---

AE, adverse event; ADR, adverse drug reaction; GIST, gastrointestinal stromal tumors. Incidence rates are presented as number (%) of patients with AE and ADR. \* Unexpected AE.

**Table S4.** Incidence rates of AEs and ADRs for HCC patients

| <b>HCC(N=33)</b>                           |           |           |            |           |
|--------------------------------------------|-----------|-----------|------------|-----------|
|                                            | <b>AE</b> |           | <b>ADR</b> |           |
|                                            | Any grade | ≥ Grade 3 | Any grade  | ≥ Grade 3 |
|                                            | No. (%)   | No. (%)   | No. (%)    | No. (%)   |
| <b>Clinical adverse event</b>              |           |           |            |           |
| Palmar-plantar erythrodysesthesia syndrome | 5 (15.2)  | 0 (0.0)   | 5 (15.2)   | 0 (0.0)   |
| Abdominal pain                             | 4 (12.1)  | 1 (3.0)   | 3 (9.1)    | 0 (0.0)   |
| Pyrexia                                    | 3 (9.1)   | 0 (0.0)   | 0 (0.0)    | 0 (0.0)   |
| Abdominal distension*                      | 2 (6.1)   | 2 (6.1)   | 0 (0.0)    | 0 (0.0)   |
| Abdominal pain upper                       | 2 (6.1)   | 0 (0.0)   | 2 (6.1)    | 0 (0.0)   |
| Asthenia                                   | 2 (6.1)   | 1 (3.0)   | 1 (3.0)    | 0 (0.0)   |
| Diarrhoea                                  | 2 (6.1)   | 0 (0.0)   | 1 (3.0)    | 0 (0.0)   |
| Hyperkeratosis*                            | 2 (6.1)   | 0 (0.0)   | 2 (6.1)    | 0 (0.0)   |
| Melaena                                    | 2 (6.1)   | 1 (3.0)   | 1 (3.0)    | 0 (0.0)   |
| Portal hypertension                        | 2 (6.1)   | 0 (0.0)   | 0 (0.0)    | 0 (0.0)   |
| Varices oesophageal*                       | 2 (6.1)   | 2 (6.1)   | 0 (0.0)    | 0 (0.0)   |
| Vomiting                                   | 2 (6.1)   | 0 (0.0)   | 2 (6.1)    | 0 (0.0)   |
| Abdominal discomfort*                      | 1 (3.0)   | 0 (0.0)   | 1 (3.0)    | 0 (0.0)   |
| Anxiety*                                   | 1 (3.0)   | 0 (0.0)   | 0 (0.0)    | 0 (0.0)   |
| Ascites*                                   | 1 (3.0)   | 0 (0.0)   | 0 (0.0)    | 0 (0.0)   |
| Asterixis*                                 | 1 (3.0)   | 0 (0.0)   | 1 (3.0)    | 0 (0.0)   |

|                                 |         |          |         |         |
|---------------------------------|---------|----------|---------|---------|
| Chest pain                      | 1 (3.0) | 0 (0.0)  | 0 (0.0) | 0 (0.0) |
| Cough*                          | 1 (3.0) | 0 (0.00) | 0 (0.0) | 0 (0.0) |
| Dizziness*                      | 1 (3.0) | 0 (0.00) | 1 (3.0) | 0 (0.0) |
| Fatigue                         | 1 (3.0) | 0 (0.00) | 1 (3.0) | 0 (0.0) |
| Haematuria                      | 1 (3.0) | 0 (0.00) | 0 (0.0) | 0 (0.0) |
| Headache                        | 1 (3.0) | 0 (0.00) | 1 (3.0) | 0 (0.0) |
| Hepatic encephalopathy*         | 1 (3.0) | 0 (0.00) | 0 (0.0) | 0 (0.0) |
| Hepatorenal syndrome*           | 1 (3.0) | 1 (3.03) | 0 (0.0) | 0 (0.0) |
| Nausea                          | 1 (3.0) | 0 (0.00) | 1 (3.0) | 0 (0.0) |
| Oedema*                         | 1 (3.0) | 0 (0.00) | 0 (0.0) | 0 (0.0) |
| Pneumonia                       | 1 (3.0) | 1 (3.03) | 0 (0.0) | 0 (0.0) |
| Rectal perforation              | 1 (3.0) | 1 (3.03) | 0 (0.0) | 0 (0.0) |
| Renal injury*                   | 1 (3.0) | 0 (0.00) | 0 (0.0) | 0 (0.0) |
| <b>Laboratory abnormalities</b> |         |          |         |         |
| Hypoalbuminaemia*               | 2 (6.1) | 0 (0.0)  | 0 (0.0) | 0 (0.0) |

AE, adverse event; ADR, adverse drug reaction; HCC, hepatocellular carcinoma. Incidence rates are presented as number (%) of patients with AE and ADR. \* Unexpected AE.



**Table S5.** Incidence rates of adverse events by dose modification

|                           | <b>CRC (N=254)</b> | <b>Total (N=301)</b> |
|---------------------------|--------------------|----------------------|
|                           | Incidence rate     | Incidence rate       |
|                           | N (%)              | N (%)                |
| No change                 | 162 (63.8)         | 188 (62.5)           |
| Dose reduction            | 61 (24.0)          | 71 (23.6)            |
| Dose interruption         | 53 (20.9)          | 66 (21.9)            |
| Permanent discontinuation | 66 (26.0)          | 74 (24.6)            |

AE, adverse event; CRC, colorectal cancer.

**Table S6.** Incidence of adverse event by special interest populations

|                                    | <b>AE incidence, N (%)</b> |                        |                       |                          |
|------------------------------------|----------------------------|------------------------|-----------------------|--------------------------|
|                                    | <b>CRC<br/>(N=254)</b>     | <b>GIST<br/>(N=14)</b> | <b>HCC<br/>(N=33)</b> | <b>Total<br/>(N=301)</b> |
| <b>Elderly</b>                     |                            |                        |                       |                          |
| ≥65 years                          | 59 (90.8)                  | 2 (100.0)              | 11 (78.6)             | 72 (88.9)                |
| <65 years                          | 157 (83.1)                 | 9 (75.0)               | 16 (84.2)             | 182 (82.7)               |
| <b>p-value<sup>a)</sup></b>        | <i>0.1604</i>              | <i>1.0000</i>          | <i>1.0000</i>         | <i>0.2146</i>            |
| <b>Hepatic disorders</b>           |                            |                        |                       |                          |
| Yes                                | 9 (81.8)                   | 2 (100.0)              | 0 (0.0)               | 11 (84.6)                |
| No                                 | 207 (85.2)                 | 9 (75.0)               | 27 (81.8)             | 243 (84.4)               |
| <b>p-value<sup>a)</sup></b>        | <i>0.6719</i>              | <i>1.0000</i>          | <i>NE</i>             | <i>1.0000</i>            |
| <b>Renal disorders</b>             |                            |                        |                       |                          |
| Yes                                | 24 (85.7)                  | 0 (0.0)                | 20 (90.9)             | 44 (86.3)                |
| No                                 | 192 (85.0)                 | 11 (84.6)              | 7 (63.6)              | 210 (84.0)               |
| <b>p-value<sup>a)</sup></b>        | <i>1.0000</i>              | <i>0.2143</i>          | <i>0.1458</i>         | <i>0.8333</i>            |
| <b>Cardiovascular disorders</b>    |                            |                        |                       |                          |
| Yes                                | 52 (81.3)                  | 2 (66.7)               | 7 (70.0)              | 61 (79.2)                |
| No                                 | 164 (86.3)                 | 9 (81.8)               | 20 (87.0)             | 193 (86.2)               |
| <b>p-value<sup>a)</sup></b>        | <i>0.3184</i>              | <i>1.0000</i>          | <i>0.3364</i>         | <i>0.1500</i>            |
| <b>Other concomitant disorders</b> |                            |                        |                       |                          |
| Yes                                | 129 (88.4)                 | 4 (80.0)               | 7 (63.6)              | 140 (86.4)               |
| No                                 | 87 (80.6)                  | 7 (77.8)               | 20 (90.9)             | 114 (82.0)               |
| <b>p-value<sup>a)</sup></b>        | <i>0.1089</i>              | <i>1.0000</i>          | <i>0.1458</i>         | <i>0.3402</i>            |

AE, adverse event; CRC, colorectal cancer; GIST, gastrointestinal stromal tumors; HCC, hepatocellular carcinoma. <sup>a)</sup> P-value by Fisher's exact test.

**Table S7.** Clinical parameters that affect CRC patients with and without dose modification or discontinuation\* of regorafenib administration.

| <b>Variable</b>                     | <b>Reference</b> | <b>Parameter Estimate</b> | <b>Standard Error</b> | <b>OR</b> | <b>95% CI for OR</b> | <b>p-value<sup>a)</sup></b> |
|-------------------------------------|------------------|---------------------------|-----------------------|-----------|----------------------|-----------------------------|
| <b>Sex</b>                          | Female           |                           |                       |           |                      |                             |
| Male                                |                  | -0.2172                   | 0.2516                | 0.8048    | (0.49, 1.32)         | 0.3880                      |
| <b>Age</b>                          | <70 years        |                           |                       |           |                      |                             |
| ≥70 years                           |                  | 0.4659                    | 0.3737                | 1.5934    | (0.77, 3.31)         | 0.2125                      |
| <b>Number of metastatic sites</b>   | 1                |                           |                       |           |                      |                             |
| ≥2                                  |                  | 0.1516                    | 0.2659                | 1.1637    | (0.69, 1.96)         | 0.5686                      |
| <b>Metastatic site</b>              | Other            |                           |                       |           |                      |                             |
| Liver                               |                  | 0.4431                    | 0.2697                | 1.5575    | (0.92, 2.64)         | 0.1004                      |
| <b>Prior therapy - radiotherapy</b> | No               |                           |                       |           |                      |                             |
| Yes                                 |                  | -0.2451                   | 0.2797                | 0.7826    | (0.45, 1.35)         | 0.3808                      |
| <b>Prior therapy - surgery</b>      | No               |                           |                       |           |                      |                             |
| Yes                                 |                  | -0.06                     | 0.3067                | 0.9417    | (0.52, 1.72)         | 0.8448                      |
| <b>Prior treatment lines</b>        | 1-3              |                           |                       |           |                      |                             |
| ≥4                                  |                  | -0.2138                   | 0.4016                | 0.8075    | (0.37, 1.77)         | 0.5945                      |
| <b>ECOG PS</b>                      | 0-1              |                           |                       |           |                      |                             |
| 2                                   |                  | 0.9842                    | 0.6017                | 2.6757    | (0.82, 8.70)         | 0.1019                      |
| <b>Comorbidity</b>                  | No               |                           |                       |           |                      |                             |
| Yes                                 |                  | 0.0717                    | 0.2669                | 1.0744    | (0.64, 1.81)         | 0.7881                      |
| <b>Response</b>                     | PD               |                           |                       |           |                      |                             |
| DCR                                 |                  | -0.2763                   | 0.3173                | 0.7586    | (0.41, 1.41)         | 0.3839                      |
| <b>Anti-EGFR biologics</b>          | No               |                           |                       |           |                      |                             |
| Yes                                 |                  | -0.4884                   | 0.2668                | 0.6136    | (0.36, 1.04)         | 0.0672                      |

CRC, colorectal cancer; OR, odds ratio; CI, confidence interval; ECOG PS, eastern cooperative oncology group performance status; PD, progressive disease; DCR, disease control rate; EGFR, estimated glomerular filtration rate. \*Dose modification or discontinuation included dose change, dose interruption and permanent discontinuation<sup>a)</sup> P-value by Univariate logistic regression.
